# Supplementary material
Source: PubMed Central journal article supplement (PMC5734394)
Supplement: PRO-27-293-s001.pdf [file PRO-27-293-s001.pdf]

## Methods for Hydrogen Parameter Revision

### Quantum calculations

Quantum mechanical methods for calculating electron density offer an independent, theory-based method to estimate how much the electron cloud is perturbed around each hydrogen. We have followed out that direction, to relate calculated electron density with observed difference density and with possible atomic interactions where electron clouds meet between atoms. Density for each amino acid was calculated with several quantum-chemical methods and basis sets (HF/3-21G, HF/6-31G(d,p), B3LYP/6-31G(d,p), and MP2/6-31G(d,p)) using the 64-bit Intel version of GAMESS [1], with grid spacings of 0.2Å or 0.1Å for electron density output. An alanine dipeptide was also included, to obtain data for the backbone NH. Each molecule was geometry-minimized by each of the QM methods and basis sets. Accuracy and consistency of the QM method and basis set combinations was assessed by consistency and reasonableness in fitting spherical patches to the calculated density contours in the procedure described below. It was determined that the closer grid spacing of 0.1Å was required to lower noise in the results. Furthermore, neither of the HF calculations provided a consistency of results when compared to the B3LYP and MP2 calculations even with the same basis set. The B3LYP and MP2 results were similar, and B3LYP was chosen for the major work.

The effect of the Polarizable Continuum Model (PCM) on the bond lengths and electron density was determined to be negligible. However, because the protein is always interacting with itself and other molecules, the influence of polar and nonpolar molecules on the x-H bond lengths was investigated at the MP2 level. The geometries of a water and of a methane molecule were optimized while fixing the O or C atom at a range of distances from the H $\delta$ 22 hydrogen on the side-chain N of asparagine or H $\gamma$ 1 on the side-chain O of threonine. Geometrical analysis of the electron density is hampered by the fact that H and solvent densities merge at most contour levels, but it can be determined that the electron-cloud center is further out when a solvent atom is nearby, compared with vacuum, or compared with the H $\delta$ 21 (away from the solvent molecule) in the same calculation.

### Sphere-fitting calculations

The resulting electron density was analyzed using a geometrical algorithm to fit partial spheres to a range of contour levels, looking for consistency of those sphere centers to identify the effective center of the H electron cloud. Treating the electron-cloud hydrogens as spherical on their external surfaces is of course an approximation, but a fairly good one, and more complex models are not currently feasible. A second approximation, which proves quite accurate for isolated amino acids, is that the sphere center lies along the line defined by the x-H covalent bond between the nuclei. Therefore, we only need to determine the best estimate of the sphere-center distance out along that line.

The surface of the electron density for an amino acid has a complex, multi-lobed shape. We need to fit one spherical patch (at each contour level) to represent the external shape of each hydrogen atom, a problem that differs from

those usually treated: for instance, standard sphere fitting techniques like RANSAC [2] and coresets [3] work reliably when one needs to fit just one sphere to an entire shape. Therefore, we tackle the problem of fitting multiple spheres by dividing it into two parts: 1) segmenting the contour surface into regions each of which individually should contain just one spherical patch; and 2) fitting one sphere to each such patch.

One variant of the first problem of segmenting molecular surfaces has been considered by Natarajan et al. [4], where they segment the surface into protrusions and cavities using a mean-curvature-like function. However, two of our atoms (such as an H $\beta$ 1-H $\beta$ 2 pair) may be joined as a single ellipsoidal protrusion by that method, since curvatures in orthogonal directions can cancel each other out across the shallow saddle point between the atoms. Therefore, instead of mean-curvature-like functions, we do the segmentation step using a function we call *sphericity*, related to curvature. Each vertex  $v$  on the contour surface (which is computed using the marching cubes algorithm [5]) has a sphericity value of  $1/\text{radius}$  of the sphere best fit to all vertices within  $0.3\text{\AA}$  of  $v$ ; the value is negative if the sphere is outside the surface. Finding the thinnest fitting spherical shell is a non-convex problem [6] and hence known to be computationally expensive. However, the computationally cheaper alternatives do not perform well on the flat regions of the contour surface that occur at boundaries between spherical patches. Thus our definition of sphericity, although more expensive computationally, is suitable for the purpose of atomic segmentation because spherical patches are regions of high sphericity separated from each other in all directions by regions of low or negative sphericity. Thresholding on the value of sphericity divides the surface into the desired patches, but the threshold differs for different boundaries. This can be handled by the hierarchical process of constructing a join tree [7] whose nodes correspond to patches on the contour surface. Effectively a rising "water level" of sphericity value separates out new join-tree nodes where their patches are first divided into separate islands. At a level of the join tree with a number of nodes approximating the number of atoms that are end nodes in the covalent connectivity graph of the molecule, a user can easily identify the patches that correspond to the desired set of atoms, including one for each hydrogen. Figure S1 shows cysteine with fitted spherical patches (dot surfaces) at two of the contour levels for each of the atoms, with the sphere centers marked along the bond vector.

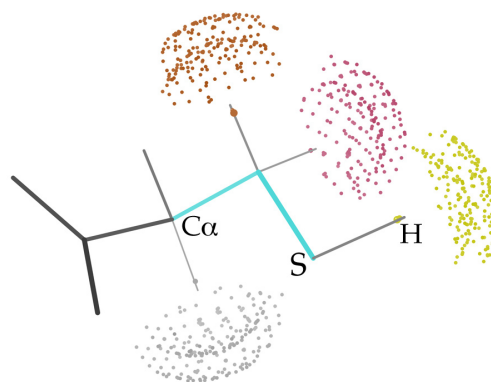

Cys: H atom sphere-fit to QM electron density

Having completed step 1, we are now left with multiple instances of fitting a sphere to a chosen patch at a given contour level: that is, computing a thin spherical shell that contains a large number of the vertices in that patch. We use several properties of this specific molecular system to help choose the right compromise between shell thinness and vertex coverage. a) For isolated amino acids, the convex portions of the electron density contours around each

protruding atom do not have points or dimples, but they are distorted to lower sphericity levels around the edges toward their boundaries with surrounding atoms; we use that fact to discard the lowest-sphericity half of the vertices in each potential patch. b) The patch corresponding to a hydrogen should have a fairly smooth boundary, so we discard vertices where the local boundary has an internal angle less than  $120^\circ$ . c) The patch should be connected, so if not, we choose the largest connected component. These rules allow us to shrink down to a well-behaved patch, and then fit a spherical shell that contains its vertices, using the lifting map technique [8]. We found our overall procedure insensitive to the parameter values involved (such as the  $0.3\text{\AA}$  radius for vertex neighbors).

We know approximately the radius (which translates here to an electron-density level) at which atom-atom contact effectively occurs: generously, the possible range is no wider than  $0.7$  to  $1.3\text{\AA}$  for hydrogens. Therefore, we analyze the sphere centers found for multiple contour levels across that range, by plotting the distance of those sphere-patch centers from the parent heavy atom as a function of sphere radius, expecting reasonable consensus across contour levels (sphere radii) and across examples of a specified atom type. Experimental scatter of both sorts was considerably reduced for quantum electron density values calculated on a  $0.1\text{\AA}$  grid spacing rather than  $0.2\text{\AA}$ , so  $0.1\text{\AA}$  was used in this work.

Examples of the resulting distance-vs-radius plots are shown in Figure S2a for methylene CH<sub>2</sub> hydrogens (22 H atoms from 8 different amino acids) and Figure S2b for planar NH groups (4 H atom examples). The electron-cloud centers inferred from the near-flat regions in these plots are  $0.96 \pm 0.01\text{\AA}$  for tetrahedral CH<sub>2</sub> and  $0.79 \pm 0.01\text{\AA}$  for planar NH.

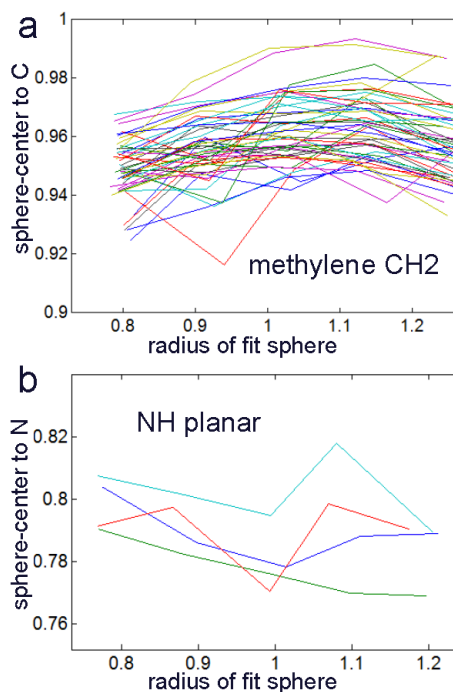

#### Database analyses: nuclear x-H distances

To document nuclear x-H distances, we first revisited the classic neutron crystallography structures from the 1970's that cover 12 of the amino acids (e.g., [9-11]). Those included 50-80 measurements for N-H and C-H but only 4-5 values for O-H and S-H.

We then tabulated and plotted x-H distances for 78 relevant neutron structures in the Cambridge Structural Database (CSD; version 5.33 plus 4 updates; [12]), chosen as normal amino acids or nucleotides, or found by search with a fragment drawing such as C-S-H (see list of CSD codes below). Distances were measured in the Conquest viewer with atoms labeled and packing turned on, and were grouped into planar sp<sup>2</sup> versus tetrahedral sp<sup>3</sup> geometries, with the latter divided into CH<sub>1</sub>, CH<sub>2</sub>, or CH<sub>3</sub> examples. For O-H, the neutron data included a good representation of water, phosphate, and carboxylate as well as Ser/Thr/Tyr/ribose examples, with quite distinct values, so those were each

tabulated separately. In contrast, we found for a given geometry and parent atom that x-D and x-H were indistinguishable at the level of accuracy achievable (also found for electron diffraction) [13], so those were combined. However, we could identify only one additional S-H value even with an open search just requiring an S and an H atom.

Checking neutron structures in the wwPDB (worldwide Protein Data Bank; [14]), we found only three with a free cysteine (3KKX, 3KMF, 4G0C); all 8 S-H distances were  $0.96 \pm .004 \text{ \AA}$ ; that reflects an unlikely target value in CNS presumably copied from C-H in the absence of a ShelX value for S-H, and we have not used those datapoints. We also compared the few but precise measurements from electron diffraction [13] and nuclear magnetic resonance [15], and methane C-H from *ab initio* calculation [16].

#### Database analyses: electron-cloud-center x-H distances

For electron-cloud C-H distances, the QM/sphere-fit calculated values closely matched the ShelX [17] values, but for polar x-H they were substantially shorter than in ShelX, thus requiring further study. N-H, O-H, and S-H distances were tabulated and plotted from 162 relevant X-ray structures in the CSD (see file list below). Examining distributions for these distance values showed many problems, such as apparent use of incorrect values (as above), overuse of exact "ideal" values rather than derived from the data, searching on 'x-ray' also returning neutron structures from joint refinement or just from the same paper, and so on. We have trimmed really extreme outliers on the distribution tails, but also undertook a new study where we could readily examine difference peaks for the H atoms.

The COD (Crystallography Open Database; [18]) was used for evaluating x-ray electron density for hydrogens, by scripting the open-source Olex2 viewer ([19]; <http://www.olex2.org>) to strip H atoms, calculate and display H difference density, and enable interactive adjustment of x-H distance if unambiguously needed. We examined 124 COD structures of amino acids, nucleic acids, and carbohydrates chosen by suitable Smiles strings, and tabulated N-H, O-H, S-H, and some CH distances. These fell into three cases: a) missing or poor H difference peak – omitted; b) clear H difference peak, fit fairly well by deposited H atom – kept; c) clear H difference peak, but not fit by deposited H atom – the x-H distance was adjusted. There is still some uncertainty in distinguishing a difference peak produced by an H atom from one produced from motion of the parent atom, from solvent issues, or from noise; however, this COD protocol produces many fewer obvious artifacts and is more robustly coupled to the experimental data. Most significantly for OH (Figure S3), the COD adjustments helped correct a clearly evident previous bias in favor of assigning the ShelX distance value. For these reasons, the adjusted COD values are emphasized in our overall compilation.

For another specific set of tests on electron-cloud distance

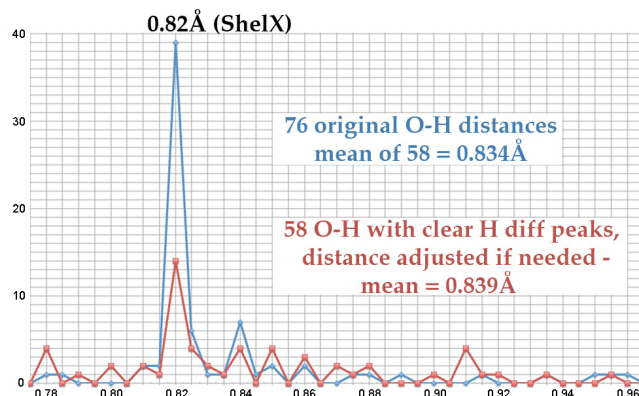

values, PDB x-ray structures at  $<1\text{\AA}$  resolution with  $>150$  residues were checked for occurrence frequency and appearance of H difference peaks. 12 files containing a total of  $>4000$  residues were chosen for examination in Coot [20] and measurement from parent atom to H difference peak center (see file list below), for distinguishing C-H chemical types and for documenting polar x-H distances in H-bonding vs non-polar environments.

#### Database analyses: van der Waals radii

For determination of updated van der Waals radii tuned for each new x-H distance set, we used the Top8000 dataset ([21]; available on GitHub) of non-redundant X-ray protein chains with MolProbity score  $<2.0$  and resolution better than  $2\text{\AA}$ , and residue-level quality filters.

Hydrogens were added and optimized with Reduce [22], including Asn/Gln/His flips where indicated. The one-dot-each modification of Probe [23], which outputs only a single contact dot to the nearest target atom, was used to calculate the smallest distance between the van der Waals spheres for a given pair of atoms – the "min gap". Figure S4 illustrates the just-touching, min-gap zero case. Looking only at the nearest neighbor rather than all neighbors, and using the OneDotEach function, eliminates issues with occluding or very distant atoms and produces much more interpretable distance distributions. Note that these "van der Waals radii" are meant to represent the preferred packing distance, not completely hard spheres, so some min gap values should be negative.

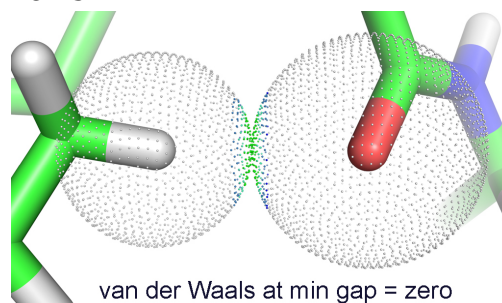

Runs were done three different ways: 1) using previous MolProbity nuclear values for both x-H and van der Waals, 2) using the previous ShelX/PHENIX x-H distances and MolProbity van der Waals lengthened by  $0.05\text{\AA}$  for H (but with  $1.70\text{\AA}$  for non-aromatic C), and 3) using QM/sphere-fit x-H and van der Waals as for run 2. Database tables in MySQL [24] were used to filter the data by crystallographic B-factor, and distributions of min gap value were produced in R [25]. By default, only atom pairs with source and target atom B-factors  $<10$  were retained. If that resulted in  $<500$  pairs, the cutoff was raised, but atom-pair types with  $<500$  examples at a  $B<30$  cutoff were not analyzed. For visual comparison of related distributions, one reference case was chosen whose maximum counts per  $0.01\text{\AA}$  bin were typical of the group, usually around 2000 counts. A scalar multiplier was applied to the count values of the other, non-reference, distributions in the group, to bring them into comparable range while preserving the relative order of peak heights. This allows comparison of

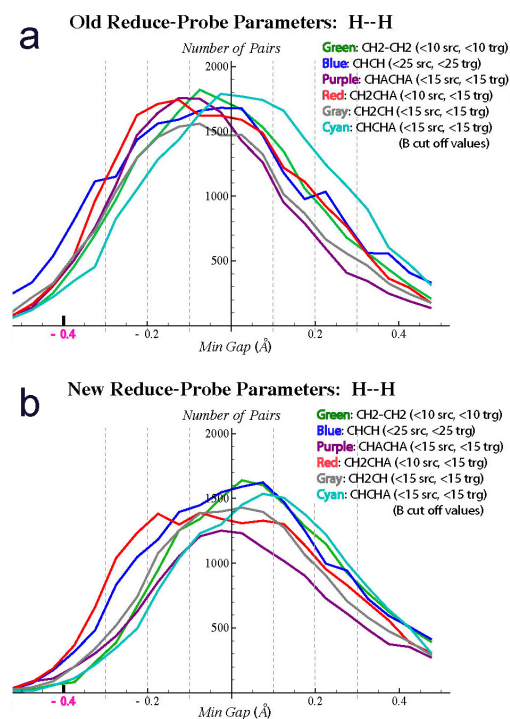

distribution shapes, without affecting determination of the preferred min gap values. Figure S5 shows the distributions of H-to-H distances for the old x-H plus van der Waals radii (peaking at overlapped min gap) vs for the revised parameters (peaking at the optimal zero min gap). Similarly, Figure 6 in the main text shows that clashscores show a more desirable distribution in the new system.



## References for Supplement

- 1 Schmidt MW, Baldridge KK, Boatz JA, Elbert ST, Gordon MS, Jensen JH, Koseki S, Matsunaga N, Nguyen KA, Su S, Windus TL, Dupuis M, Montgomery JA (1993) General Atomic and Molecular Electronic Structure System. *J Comput Chem* 14:1347-1363.
- 2 Fischler MA, Bolles RC (1981) Random sample consensus: a paradigm for model fitting with applications to image analysis and automated cartography. *Commun Assoc Comp Mach* 24:381-395.
- 3 Har-Peled S, Wang Y (2004) Shape fitting with outliers. *SIAM J Computing* 33:269–285.
- 4 Natarajan V, Wang Y, Bremer P-T, Pascucci V, Hamann B (2006) Segmenting molecular surfaces. *Computer Aided Geom Design* 23:495-509.
- 5 Lorensen WE and Cline HE (1987) Marching cubes: A high resolution 3D surface construction algorithm. *Proc Assoc Comp Mach SIGGRAPH* 1987:163-169.
- 6 Agarwal PK, Har-Peled S, Varadarajan KR (2004) Approximating extent measures of points. *J Assoc Comp Mach* 51:606-635.
- 7 Carr H, Snoeyink J, Axen U (2000) Computing contour trees in all dimensions. *Comp Geom* 24:75-94.
- 8 de Berg M, Cheong O, van Kreveld M (2008) *Computational Geometry: Algorithms and Applications*, 2<sup>nd</sup> edition, Springer-Verlag, Berlin.
- 9 Lehmann MS, Koetzle TF, Hamilton WC (1972) Precision neutron diffraction structure determination of protein and nucleic acid components. I. The crystal and molecular structure of the amino acid L-alanine. *J Am Chem Soc* 94:2657-60.
- 10 Coppens P, Vos A (1971) Electron density distribution in cyanuric acid. II. Neutron diffraction study at liquid nitrogen temperature and comparison of X-ray and neutron diffraction results. *Acta Cryst* B27:146-158.
- 11 Takusagawa F, Koetzle TF, Kou WWH, Parthasarathy R (1981) Structure of N-acetyl-L-cysteine: X-ray (T=295 K) and neutron (T=16 K) diffraction studies. *Acta Cryst* B37:1591-1596.
- 12 Allen FH (2002) The Cambridge Structural Database: a quarter of a million crystal structures and rising. *Acta Cryst* B58:380-388.
- 13 Bartell LS, Kuchitsu K (1978) Representations of molecular force fields. V. On the equilibrium structure of methane. *J Chem Phys* 68:1213-1215.
- 14 Burley SK, Berman HM, Kleywegt GJ, Markley JL, Nakamura H, Velankar S (2017) Protein Data Bank (PDB): The Single Global Macromolecular Structure Archive. *Methods Molec Biol* (Clifton NJ)1607:627-641.
- 15 Ottiger M, Bax A (1998) Determination of relative N-H<sub>N</sub>, N-C', C $\alpha$ -C', and C $\alpha$ -H $\alpha$  effective bond lengths in a protein by NMR in a dilute liquid crystalline phase. *J Am Chem Soc* 120:12334-12341.

- 16 Meyer W (1973) PNOxCI studies of electron correlation effects. I. Configuration expansion by means of nonorthogonal orbitals, and application to the ground state and ionized states of methane. *J Chem Phys* 58:1017-1035.
- 17 Sheldrick GM (2008) A short history of ShelX. *Acta Cryst A* 64:112-122.
- 18 Grazulis S, Chateigner D, Downs RT, Yokochi AT, Quiros M, Lutterotti L, Manakova E, Butkus J, Moeck P, Le Bail A (2009) Crystallography Open Database – an open-access collection of crystal structures *J Appl Cryst* 42:726-729.
- 19 Dolomanov OV, Bourhis LJ, Gildea RJ, Howard JAK, Puschmann H (2009) OLEX2: a complete structure solution, refinement, and analysis program. *J Appl Cryst* 42:229-341.
- 20 Emsley P, Lohkamp B, Scott WG, Cowtan K (2010) Features and development of Coot. *Acta Cryst D* 66:486-501.
- 21 Hintze BJ, Lewis SM, Richardson JS, Richardson DC (2016) Molprobity's ultimate rotamer library distributions for model validation. *Proteins* 84:1177–1189.
- 22 Word JM, Lovell SC, Richardson JS, Richardson DC (1999) Asparagine and glutamine: using hydrogen atom contacts in the choice of side-chain amide orientation. *J Mol Biol* 285:1735–1747.
- 23 Word JM, Lovell SC, Labean TH, Taylor HC, Zalis ME, Presley BK, Richardson JS, Richardson DC (1999) Visualizing and quantifying molecular goodness-of-fit: small-probe contact dots with explicit hydrogen atoms. *J Mol Biol* 285:1711–1733.
- 24 MySQL AB (2006) MySQL administrator's guide and language reference, 2nd ed, MySQL Press, Indianapolis.
- 25 Team RDC (2005) R: a language and environment for statistical computing, R Foundation for Statistical Computing, Vienna.

### **Lists of database files:**

#### CSD neutron entries

ACYGLY11  
ADENOS01  
AGLYSL01  
ALUCAL04  
ALUCAL05  
ARGIND11  
ASPARM02  
ASPARM03  
ASPARM05



ASPARM07  
ASPARM08  
ASPARM09  
CAXKOB01  
CAXKOB11  
CREATH04  
CREATH05  
CYSTAC01  
CYSTCL01  
CYSTCL02  
CYTOSM04  
DLASPA02  
DLSERN11  
GLCICH01  
GLUTAM01  
GLYCIN03  
GLYCIN05  
GLYCIN15  
GLYCIN16  
GLYCIN19  
GLYCIN20  
GLYCIN21  
GLYCIN22  
GLYCIN23  
GLYCIN24  
GLYGLY04  
GLYGLY09  
GLYGLY11  
GLYHCL  
HIPAC02  
HISTCM12  
HISTPA12  
HISTPA14  
HOPROL12  
IMAZOL04

IMAZOL06  
IMAZOL13  
IMZMAL11  
IMZMAL13  
KEPNAU  
LALNIN12  
LALNIN22  
LALNIN23  
LARGPH03  
LARGPH04  
LARGPH07  
LCYSTN12  
LGLUAC011  
LGLUAC03  
LHISTD13  
LSERMH10  
LTHREO02  
LTYROS11  
LYSCLH02  
LYSCLH11  
MANMUJ  
MEADEN02  
METHYM01  
NALCYS02  
NALCYS10  
NRURAM11  
PHALNC01  
SUXHID01  
TGLYSU01  
TGLYSU03  
TGLYSU11  
TGLYSU25  
VALEHC11  
WEHZAL01

CSD X-ray entries

ABANIC

ABUPUI

ABUPUI01

ABUQAP

ACAGAN

ACMBPN

ACOXUM

ACTYSN

ADEWUC

ADIBOF

ADOTAO

APALTY

ATONAZ

ATYRAN

ATYREE01

ATYREE02

ATYREE03

ATYRMA10

AWONOP

BAZQEZ

BOQCUF

BOQCUF01

BOQCUF010

BOQCUF02

BOQCUF03

BOQCUF04

BOQCUF05

BOQCUF06

BOQCUF07

BOQCUF08

BOQCUF09

BOWKOO

CAWJOA

CEDFAS

CEYCOZ (?)  
COQNAX  
COSGUM  
CYSCLM11  
DALREO  
DALRIS  
DBTYRS  
DEPJEO  
DEPJOY  
DLTYRS  
DMTYRS  
DTYROS  
ETAYOR  
EWOVAN  
FAGFEZ  
FAPKEN  
FAPLIS  
FAZHET01  
FOYTAP  
FUQLAE  
GIQQUS  
GLTLYR10  
GLUTAS02  
GLUTAS03  
GLUTAS04  
GLUTAS05  
GLUTAS06  
GLYTRE02  
GUKMUU  
GYTRE03  
HADFAT  
HIDGOQ  
HUKJUT  
HULGAW  
IXETIO

IYEBIX  
JECYUL  
JUKMEH  
KAHSOB  
KIXBOJ  
KIYFED  
KIYFIH  
KIYPUD  
LAWKIE  
LCYSTN04  
LCYSTN22  
LCYSTN23  
LCYSTN24  
LCYSTN25  
LIPYIT  
LIPYUF  
LIXJIL  
LOCJET  
LOCLOF  
LOCLOF01  
LODJOD  
LODJUJ  
LODKAQ  
LTHREO01  
LTHREO03  
LTYRHC10  
LTYROS10  
LTYROS11  
MAPKOE  
MAWGUM  
MEMTYR10  
MOQLOU  
MOVLOZ  
MOVLOZ01  
MTYROS

MTYROS01  
NALCYS02  
NALCYS10  
NANYIK  
NEPMIE  
NEPMOK  
NIZGEJ  
OTROSC  
PCTRIB10  
QAGBIK  
OJOMOP  
QANGER  
QAQPOP  
QAQPUV  
QOZNAN  
RAZPUE  
REPFEX  
SEMQUK  
SEZLOZ  
SOJPAI  
TALZUC  
TANCOC  
TANCUI  
TICFIV  
TUSMOJ  
TYRPXL10  
UCUXEW  
UPUVOR  
UPUWAE  
UPUWEI  
UZUKUW  
VAGHIV  
VAWTAQ  
VEDCEM  
VEDCOW

VEGHEV  
VIFFEW  
VINDIF  
WASVAN  
WOVTOQ  
XAWBUU  
XIKKIK01  
XIMJAF  
XIMJAF01  
YASKEJ  
YEBMEX  
YEDGOD  
YEFTUZ  
YEFVAH  
YEJTIQ  
YIPWEZ  
YIPWID  
YIPWOJ  
YIPWUP  
ZAMZES  
ZEFZAL10  
ZOPZOT  
ZULWEI

PDB high-resolution entries with good H difference peaks

1byi 0.97 224 dethiobiotin synthase  
1gwe 0.88 503 catalase  
1ix9 0.90 205x2 Mn superoxide dismutase  
1m40 0.85 263 TEM-1 beta lactamase TS-complex  
2ddx 0.86 333 xylanase  
2e4t 0.96 519 cellulase Cel44A  
2p74 0.88 263x2 CTX-M-9 apo beta lactamase  
2xtt 0.93 223+36 trypsin  
2z6w 0.96 165+11 cyclophilin/cyclosporin



3f7l 0.99 152 Cu,Zn superoxide dismutase  
3g63 0.88 381 PfluDING (now obsoleted by 4f1v)  
3lz5 0.95 316 aldose reductase

COD X-ray entries

2007362

2008732

2009193

2010697

2010698

2010756

2010852

2010913

2011015

2011462

2011463

2011619

2011627

2011663

2011719

2011951

2011995

2012166

2012283

2012378

2012875

2012949

2012974

2013180

2013332

2013353

2013821

2013893

2014209  
2014266  
2014370  
2014935  
2014954  
2014976  
2015074  
2015152  
2015153  
2015219  
2015336  
2015363  
2015476  
2015749  
2016423  
2016490  
2016491  
2016492  
2016493  
2016644  
2017100  
2018039  
2103180  
2103453  
2103480  
2103481  
2103647  
2103648  
2103746  
2104650  
2200057  
2200281  
2200453

2200500  
2200501  
2201007  
2202215  
2202470  
2202913  
2202947  
2203711  
2204520  
2205292  
2205705  
2206130  
2206391  
2206612  
2206918  
2207108  
2207177  
2207595  
2207905  
2208394  
2209426  
2209573  
2211269  
2211552  
2211856  
2212022  
2212920  
2213032  
2213115  
2213204  
2213333  
2213757  
2214252

2214410  
2215349  
2217293  
2217301  
2217410  
2217653  
2218369  
2218405  
2218435  
2218503  
2219071  
2220934  
2221397  
2221894  
2223740  
2224387  
2224476  
2224690  
2225028  
2225082  
2225187  
2225832  
2225977  
2226014  
2227303  
2227519  
2227617  
2228836  
2229608  
2230555
